# Supplementary material for: Highly selective immobilization of amoxicillin antibiotic on carbon nanotube modified electrodes and its antibacterial activity
Source: Royal Society of Chemistry journal article supplement (doi:10.1039/c0jm02262d), 2010-01-01
Supplement: c0jm02262d.pdf [file c0jm02262d.pdf]

## Supplementary Data

### Highly selective immobilization of amoxicillin antibiotic on carbon nanotube modified electrodes and its antibacterial activity

Annamalai Senthil Kumar,<sup>\*a</sup> Sundaram Sornambikai,<sup>a</sup> Lakshmiathy Deepika<sup>b</sup> and Jyh-Myng Zen<sup>c</sup>

<sup>a</sup>*Environmental and Analytical Chemistry Division, School of Advanced Sciences, Vellore Institute of Technology University, Vellore-632 014, India, India. Fax: +91 416 2243092; Tel: +91 -416- 2202754; E-mail: askumarchem@yahoo.com*

<sup>b</sup>*Division of Biomolecules and Genetics, School of Biosciences and Technology, Vellore Institute of Technology University, Vellore-632 014, India.*

<sup>c</sup>*Department of Chemistry, National Chung Hsing University, Taichung 402, Taiwan*

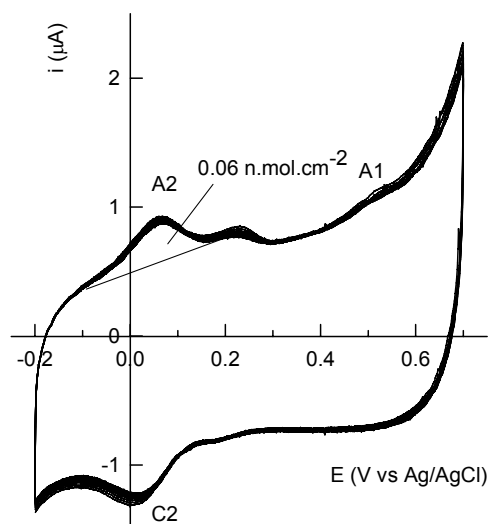

Figure S1. CV response of solution phase synthesized AMX@MWNT powder sample modified glassy carbon electrode response in a blank pH 7 PBS at a scan rate of 50 mV/s.

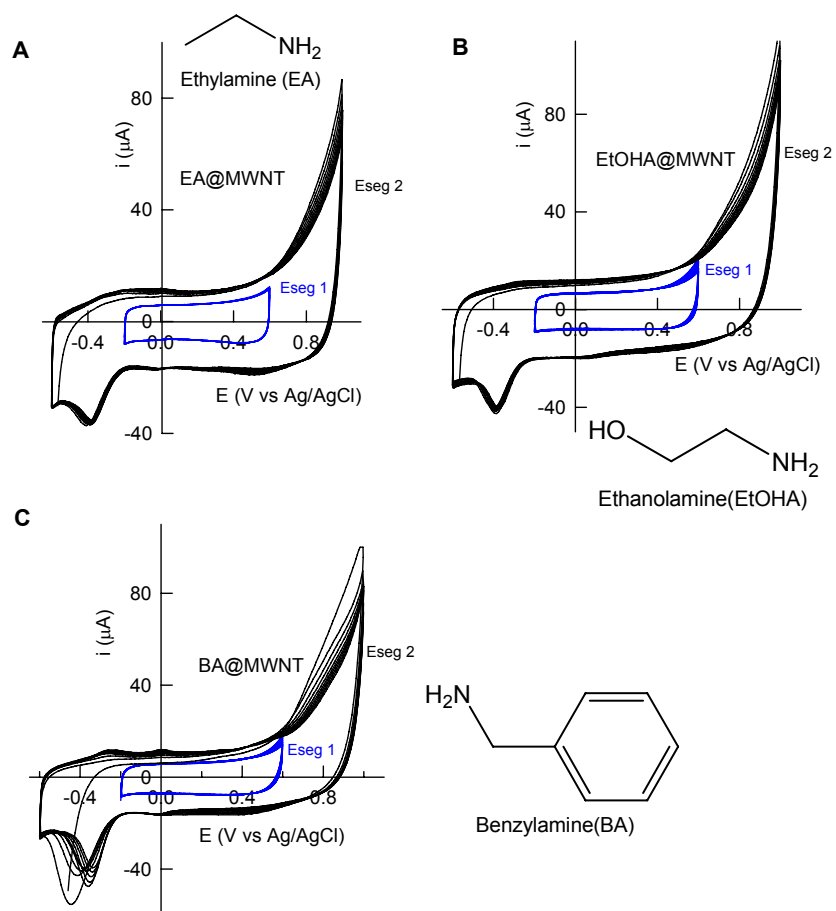

Figure S2. CV response of GCE/MWNT at two different potential windows (Eseg1 = shorter potential window) with various amines (1 mM) containing organic compounds in pH 7 PBS at a scan rate of 50 mV/s.

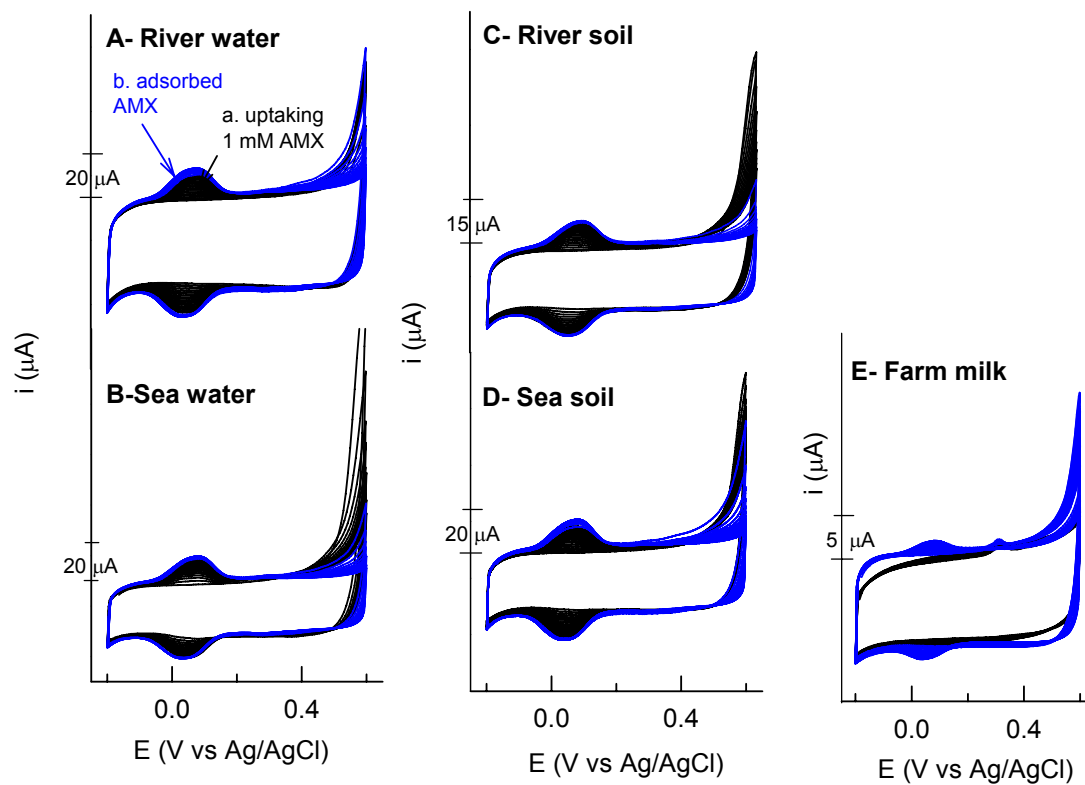

Figure S3. CV responses of GCE/MWNTs for the uptake of Amoxicillin (1 mM) present in different simulated real samples of pH 7 PBS at a scan rate of 50 mV/s.
